# Supplementary material for: Synthesis and unimolecular micelles of amphiphilic copolymer with dendritic poly(l-lactide) core and poly(ethylene oxide) shell for drug delivery
Source: Royal Society of Chemistry journal article supplement (doi:10.1039/c5ra19942e), 2015-01-01
Supplement: c5ra19942e1.pdf [file c5ra19942e1.pdf]

## Supporting Information

### Synthesis and Unimolecular Micelles of Amphiphilic Copolymer with Dendritic Poly(L-lactide) Core and Poly(ethylene oxide) shell for Drug Delivery

Xiaoshan Fan<sup>a,b</sup>, Zhiguo Hu<sup>\*,a</sup> and Guowei Wang<sup>\*,b</sup>

<sup>a</sup> Collaborative Innovation Center of Henan Province for Green Manufacturing of Fine Chemicals, Key Laboratory of Green Chemical Media and Reactions, Ministry of Education, School of Chemistry and Chemical Engineering, Henan Normal University, Xinxiang, 453007, People's Republic of China

<sup>b</sup> State Key Laboratory of Molecular Engineering of Polymers, Fudan University, People's Republic of China

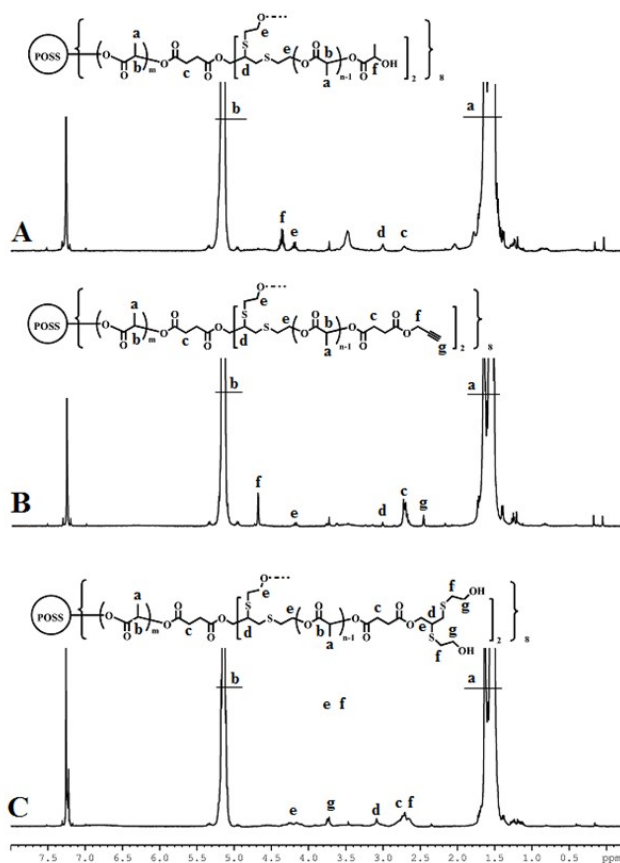

**Figure S1.** <sup>1</sup>H NMR spectra of POSS-(G<sub>2</sub>-PLLA-OH)<sub>8</sub> (A), POSS-(G<sub>2</sub>-PLLA-alkyne)<sub>8</sub> (B) and POSS-(G<sub>2</sub>-PLLA-2OH)<sub>8</sub> (C) in CDCl<sub>3</sub>.

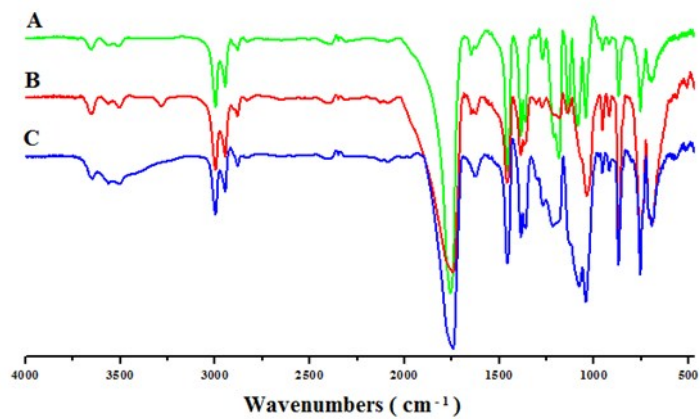

**Figure S2.** FT-IR spectra of POSS-(*G*<sub>1</sub>-PLLA-OH)<sub>8</sub> (A), POSS-(*G*<sub>1</sub>-PLLA-alkyne)<sub>8</sub> (B) and POSS-(*G*<sub>1</sub>-PLLA-2OH)<sub>8</sub> (C).

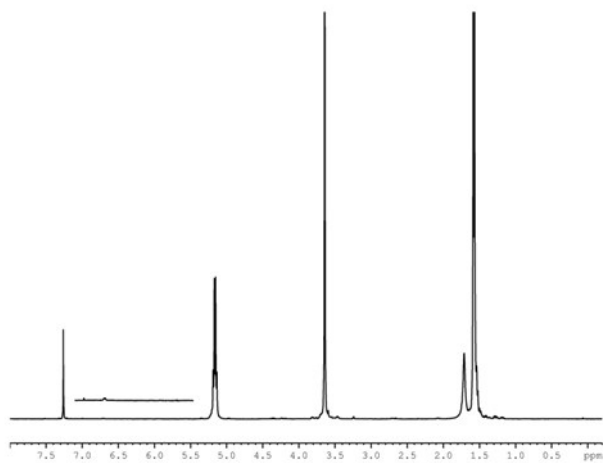

**Figure S3.** <sup>1</sup>H NMR spectra of POSS-(*G*<sub>3</sub>-PLLA-b-PEO-COOH)<sub>8</sub> in CDCl<sub>3</sub>.
